# Supplementary material for: A motor neuron disease-associated mutation produces non-glycosylated Seipin that induces ER stress and apoptosis by inactivating SERCA2b
Source: eLife journal article supplement (doi:10.7554/elife.74805), 2022-11-07
Supplement: fig1-data1 [file Fig. 1-source data.pdf › Fig. 1-source data 1/Fig. 1-source data.pdf]

# Fig.1-source data

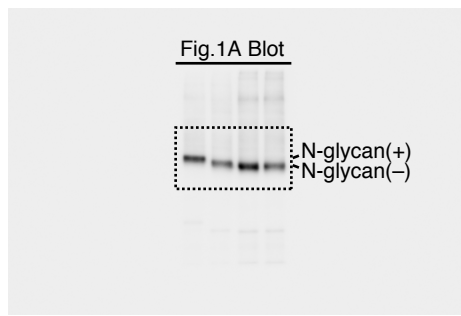

Mouse Anti-Myc Direct

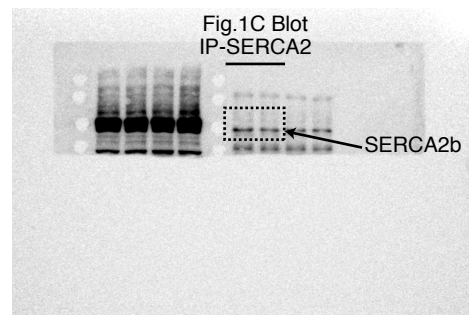

Mouse Anti-SERCA2

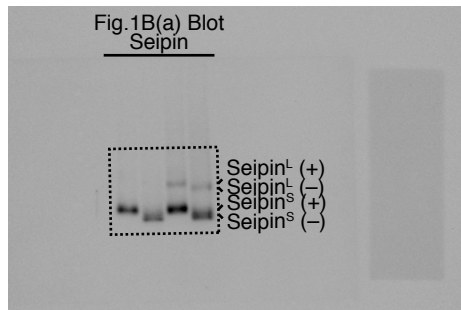

Rabbit Anti-Seipin

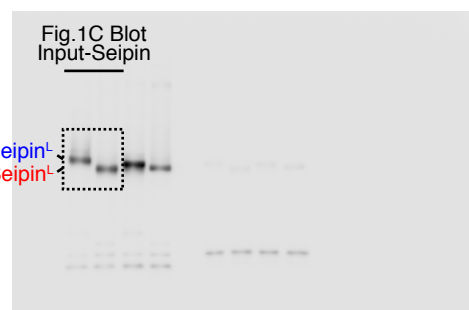

Mouse Anti-Myc Direct

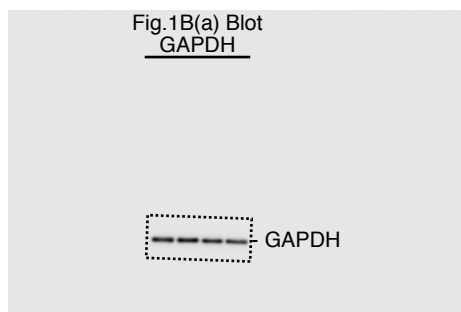

Mouse Anti-GAPDH Direct

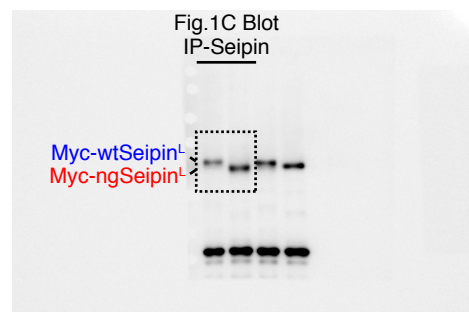

Mouse Anti-Myc Direct

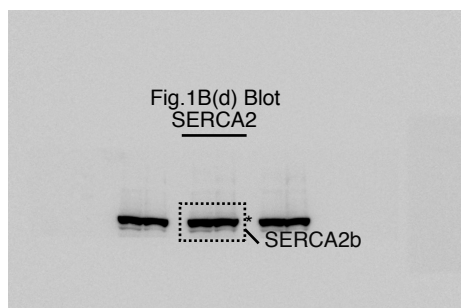

Mouse Anti-SERCA2

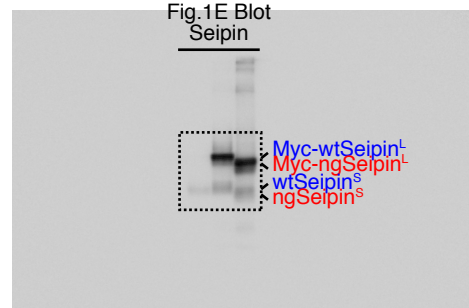

Rabbit Anti-Seipin

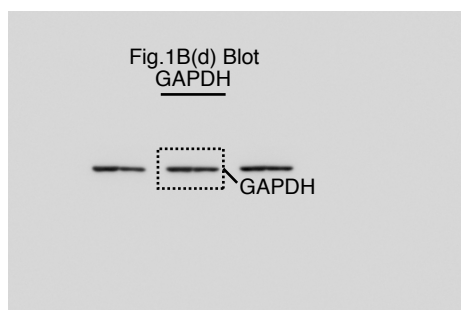

Mouse Anti-GAPDH Direct

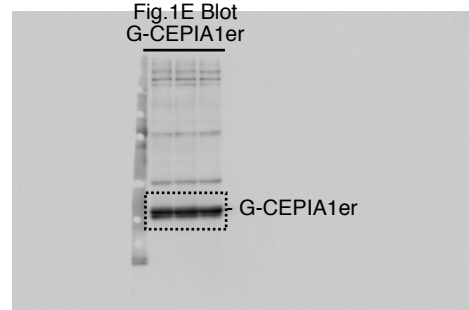

Rabbit Anti-GFP

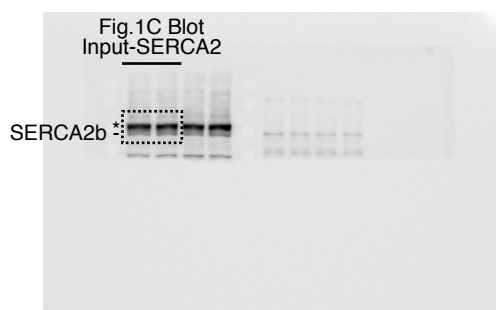

Mouse Anti-SERCA2

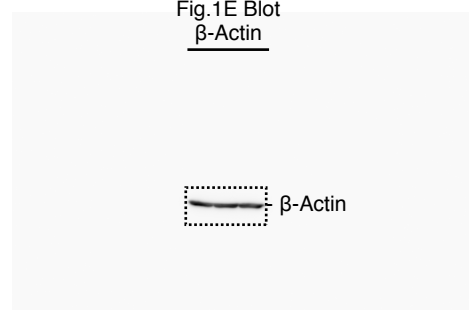

Mouse Anti-β-Actin
