# Supplementary figures and images for: A motor neuron disease-associated mutation produces non-glycosylated Seipin that induces ER stress and apoptosis by inactivating SERCA2b
Source: eLife journal article supplement (doi:10.7554/elife.74805), 2022-11-07

Fig.10-S1-source data

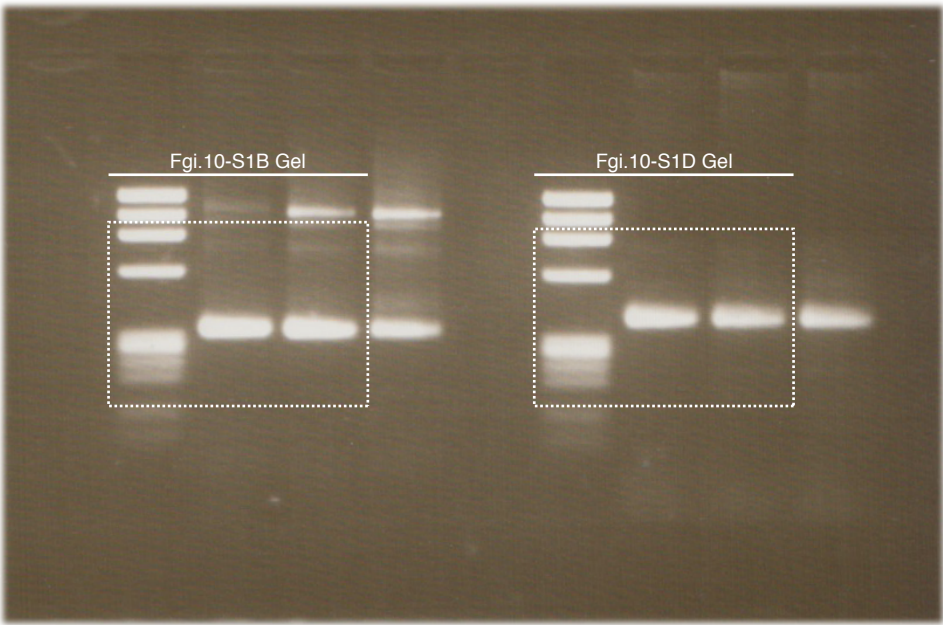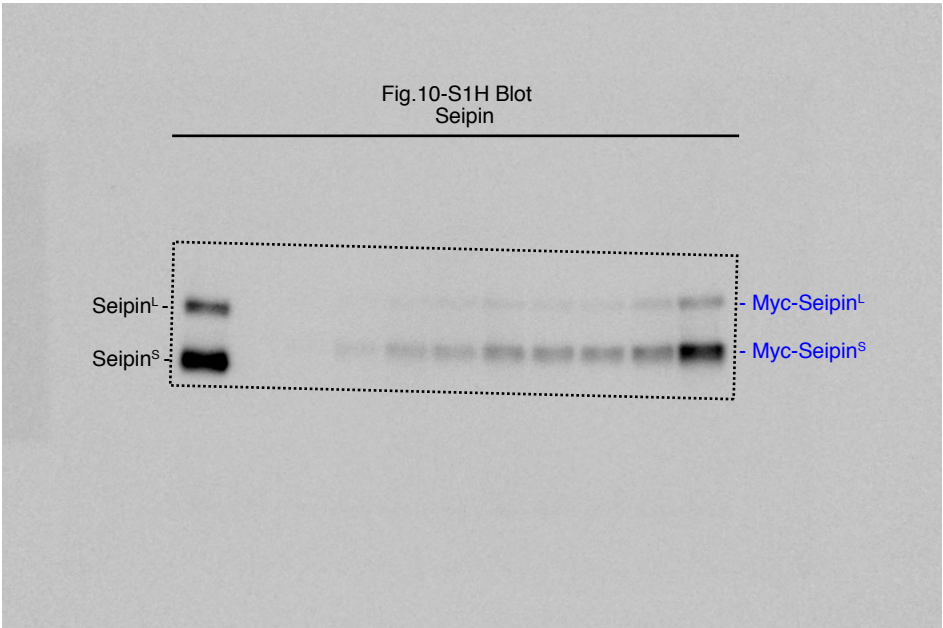

Rabbit anti-Seipin

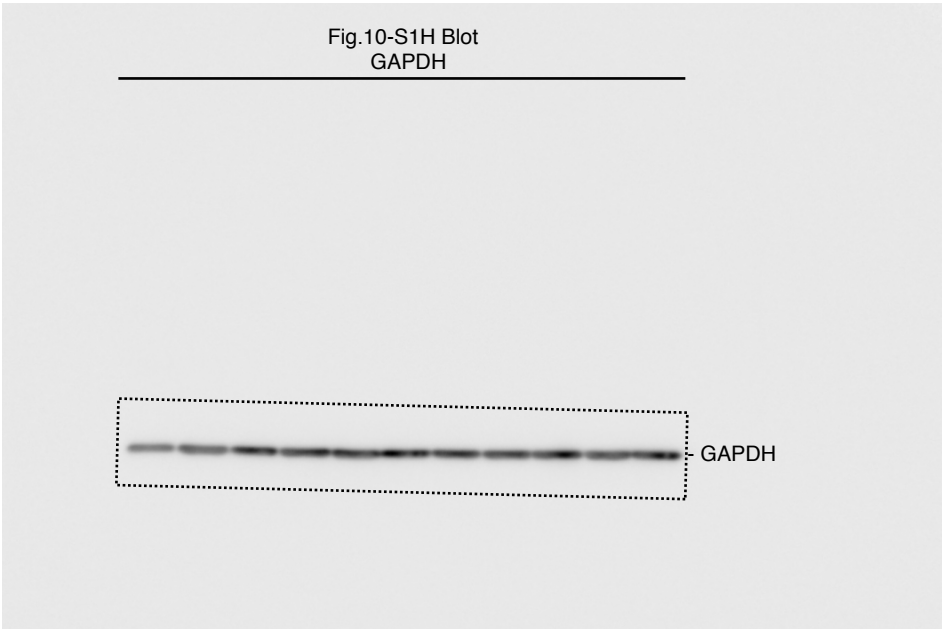

Mouse anti-GAPDH Direct

Supplement: fig10-figsupp1-data1 [file Fig. 10-S1-source data.pdf › Fig. 10-S1-source data 1/Fig. 10-S1-source data.pdf]

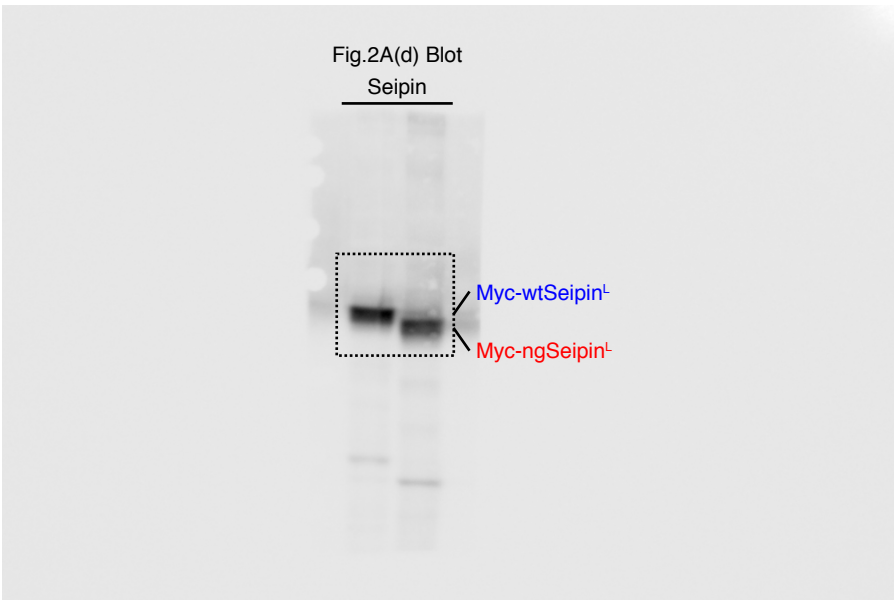

Mouse Anti-myc Direct

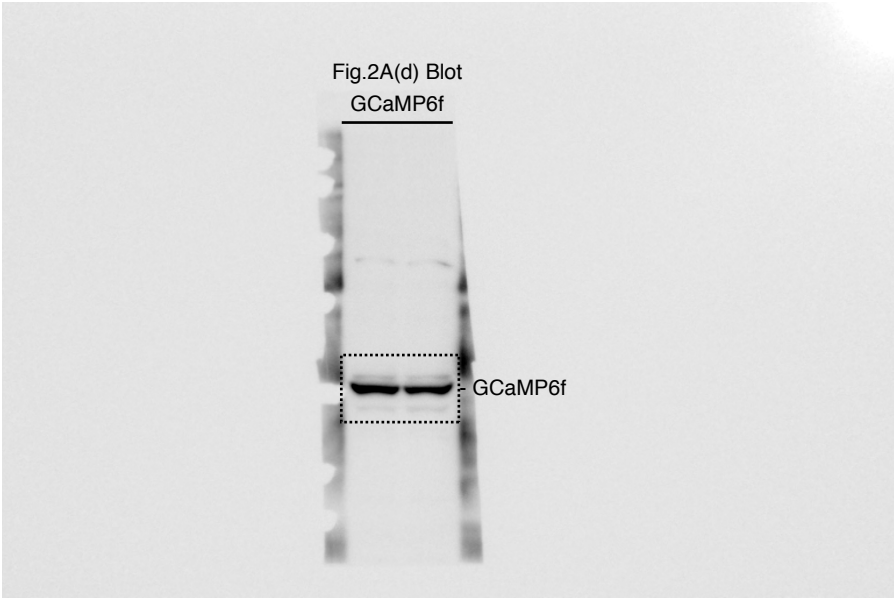

Rabbit Anti-GFP

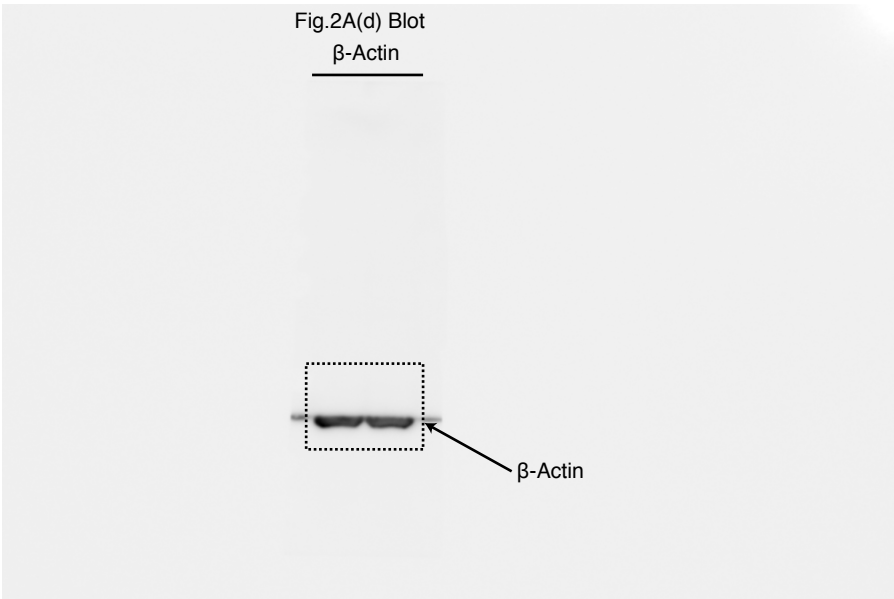

Mouse Anti- $\beta$ -Actin

Supplement: fig2-data1 [file Fig. 2-source data.pdf › Fig. 2-source data 1/Fig. 2-source data.pdf]

Fig.2-S1-source data

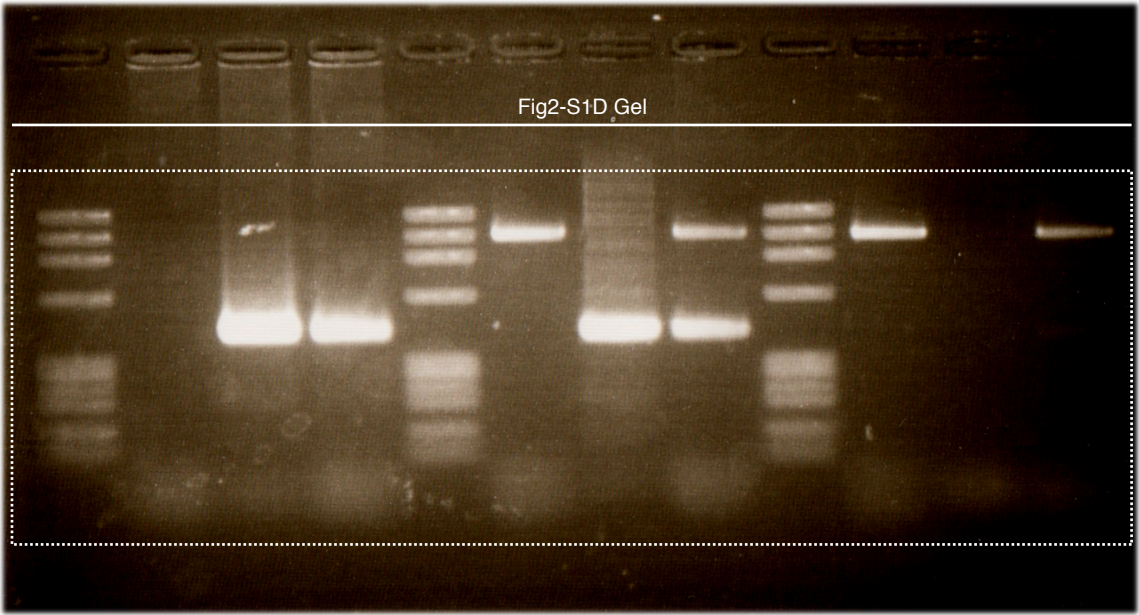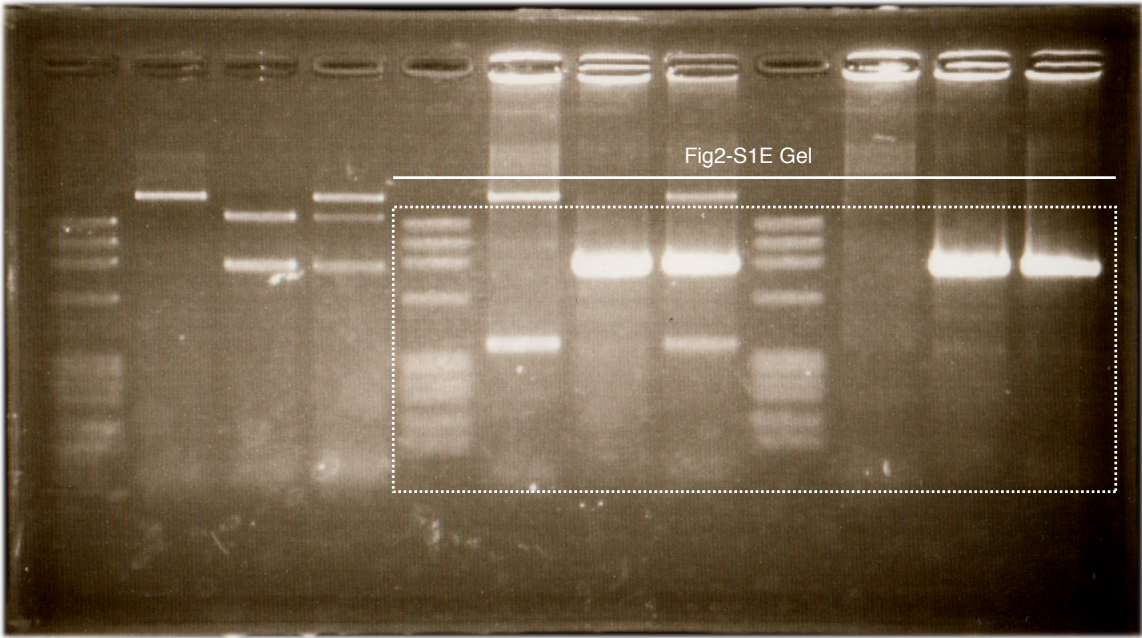

Supplement: fig2-figsupp1-data1 [file Fig. 2-S1-source data.pdf › Fig. 2-S1-source data 1/Fig. 2-S1-source data.pdf]

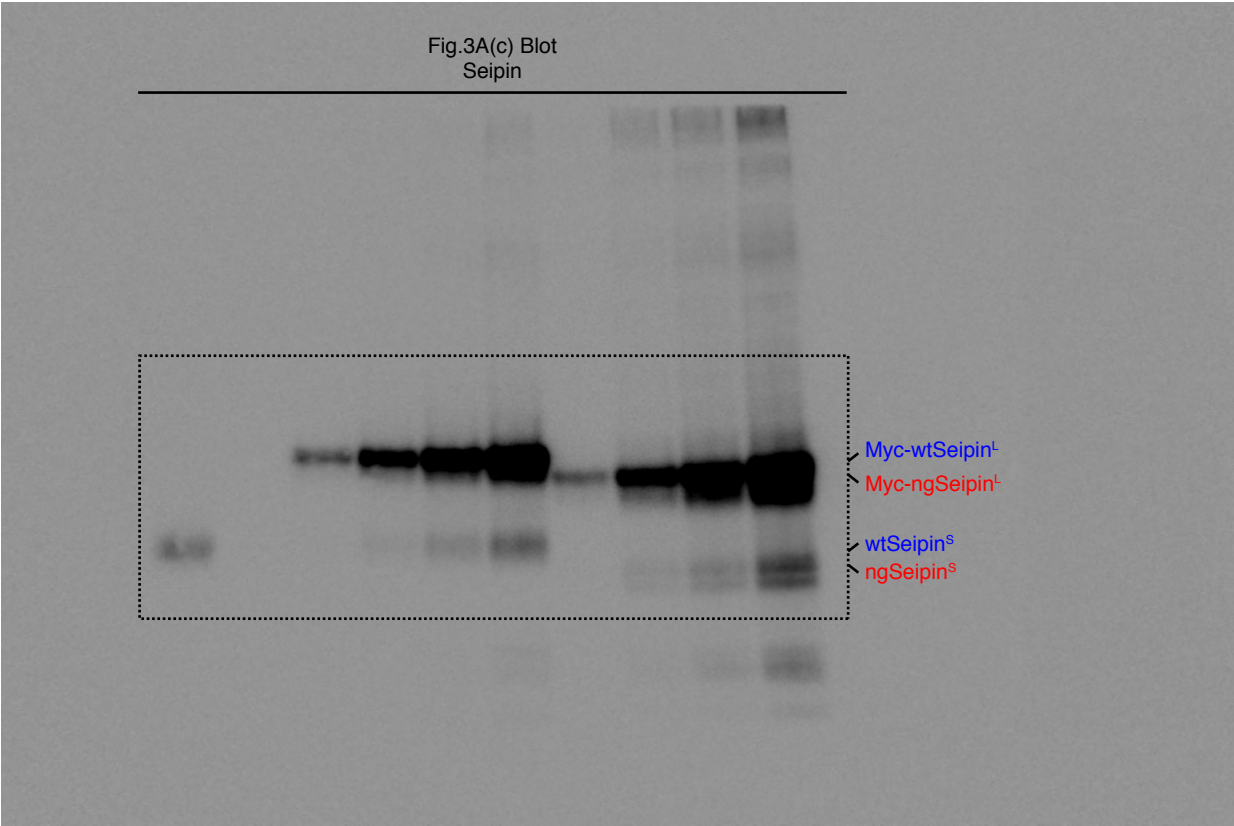

Rabbit Anti-Seipin

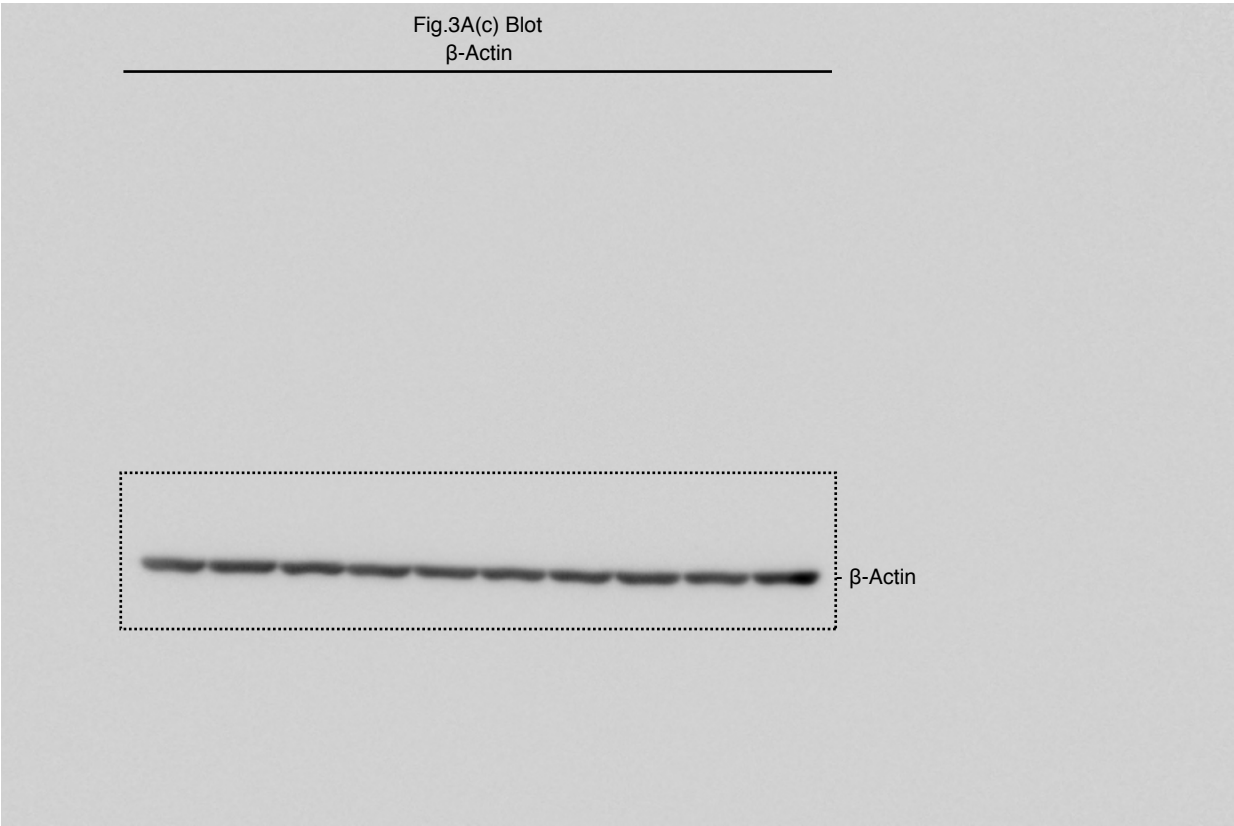

Mouse Anti- $\beta$ -Actin

Supplement: fig3-data1 [file elife-74805-fig3-data1-v1.zip]

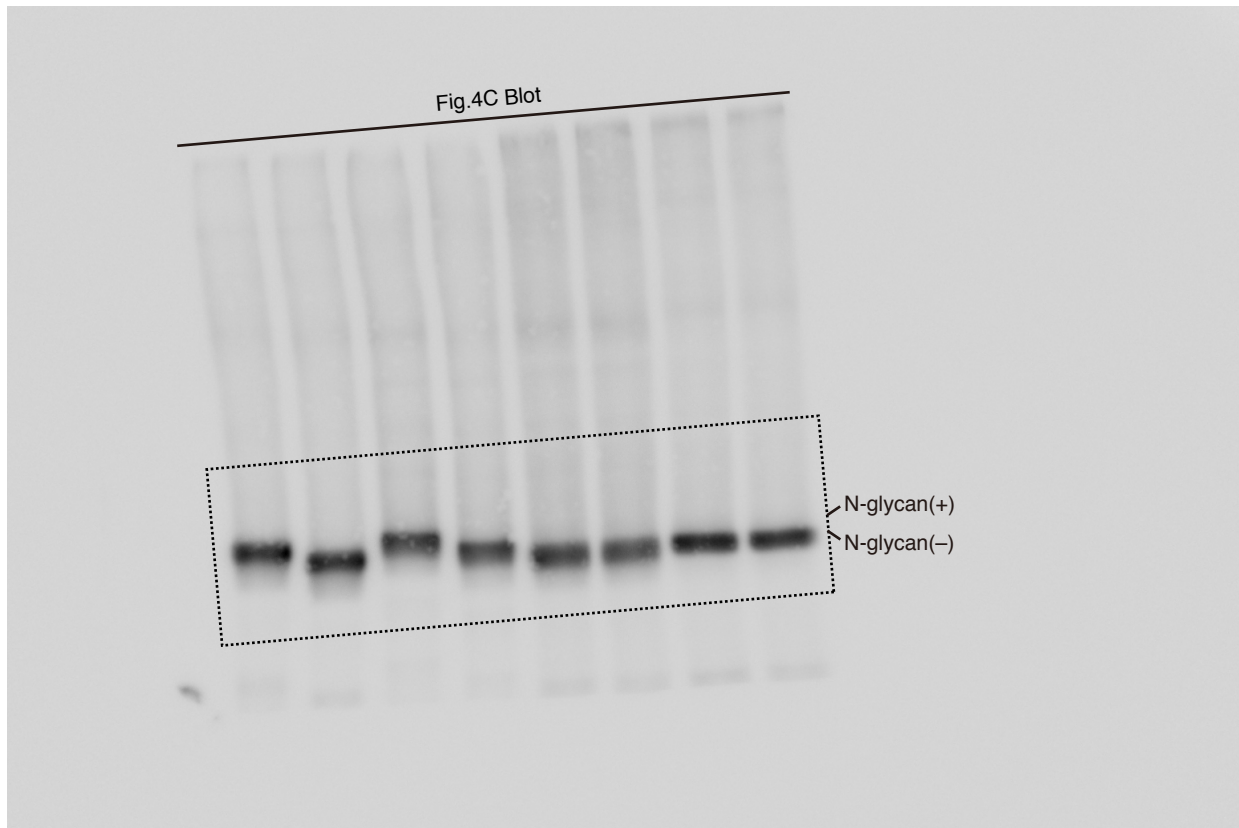

Supplement: fig4-data1 [file elife-74805-fig4-data1-v1.zip]

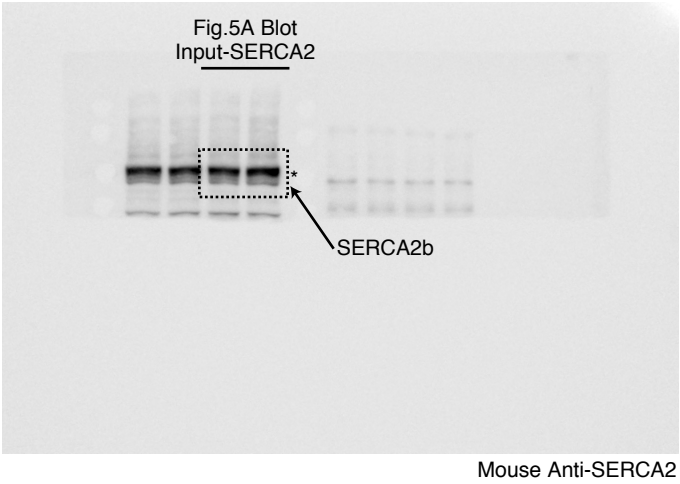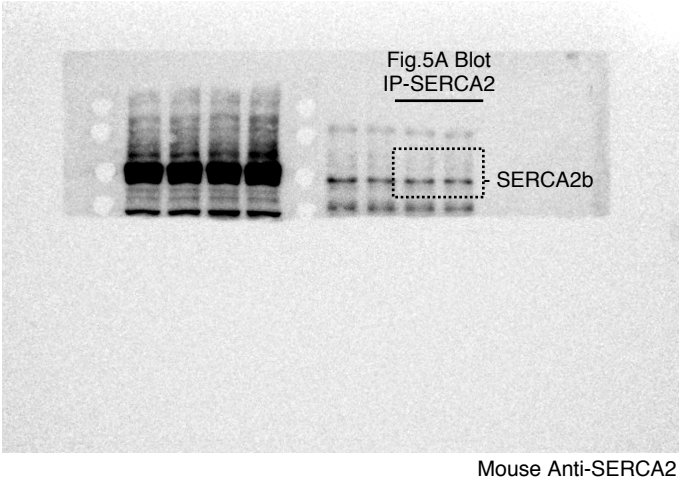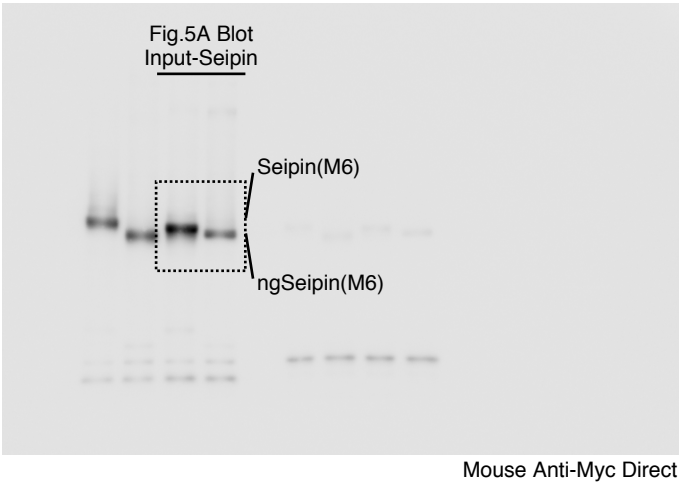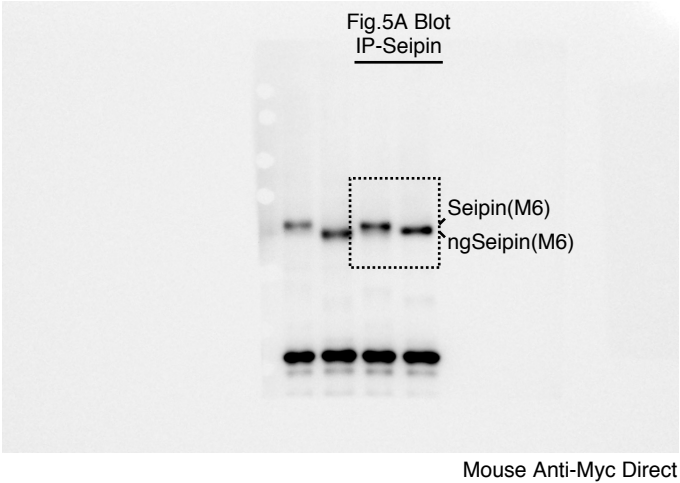

Supplement: fig5-data1 [file Fig.5-source data.pdf › Fig. 5-source data 1/Fig.5-source data.pdf]

**Fig.6-S1-source data**

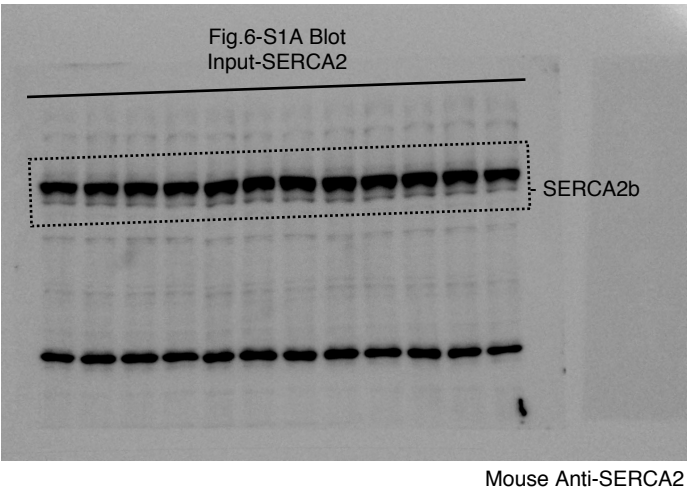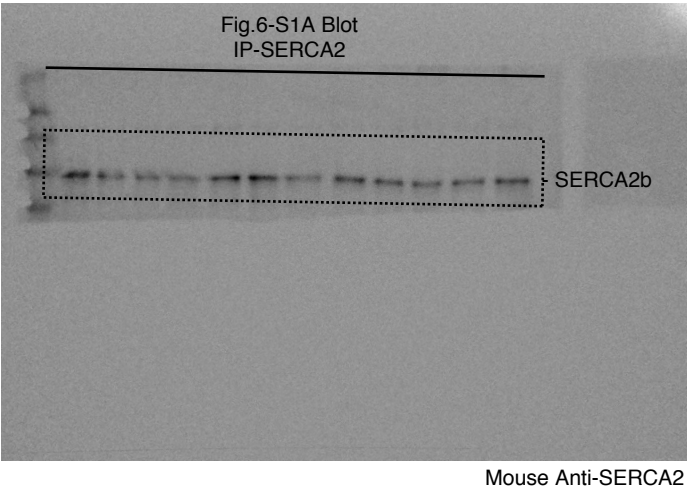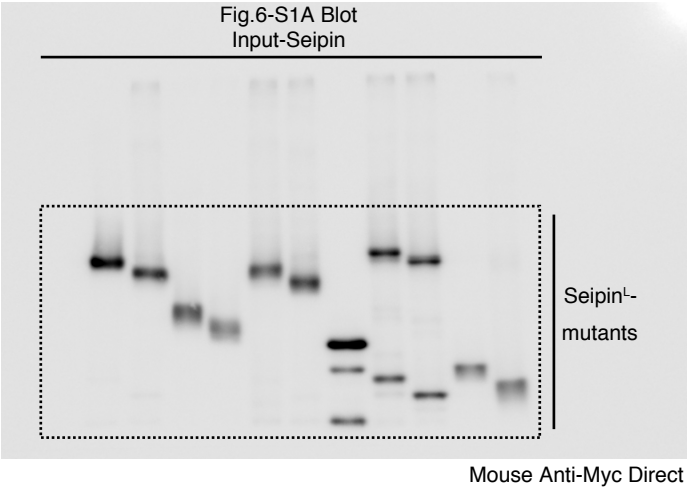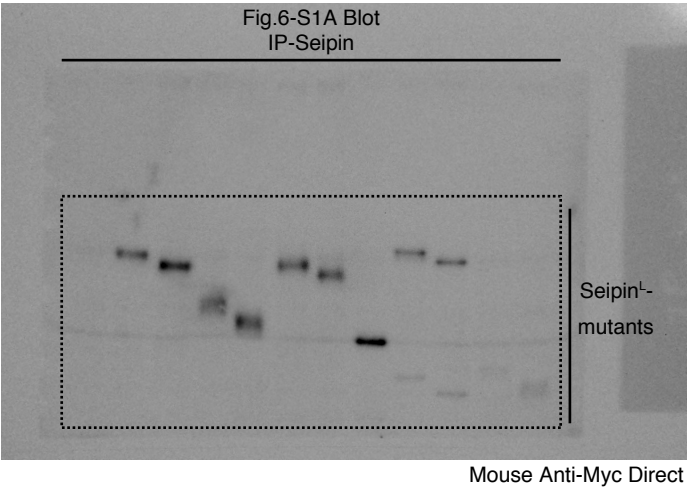

Supplement: fig6-figsupp1-data1 [file Fig. 6-S1-source data.pdf › Fig. 6-S1-source data 1/Fig. 6-S1-source data.pdf]
